# Supplementary material for: Development of a Replication-Deficient Bacteriophage Reporter Lacking an Essential Baseplate Wedge Subunit
Source: MDPI journal article supplement (doi:10.3390/v16010008), 2023-12-20
Supplement: s1 [file s1]

# Development of a Replication-Deficient Bacteriophage Reporter Lacking an Essential Baseplate Wedge Subunit

Jose Gil <sup>1</sup>, John Paulson <sup>2</sup>, Henriett Zahn <sup>2</sup>, Matthew Brown <sup>3</sup>, Minh M. Nguyen <sup>2</sup>, and Stephen Erickson <sup>2,\*</sup>

<sup>1</sup> Laboratory Corporation of America Holdings, Los Angeles, CA 90062, USA

<sup>2</sup> Laboratory Corporation of America Holdings, New Brighton, MN 55112, USA

<sup>3</sup> Laboratory Corporation of America Holdings, Burlington, NC 27215, USA

\* Correspondence: erickss@labcorp.com

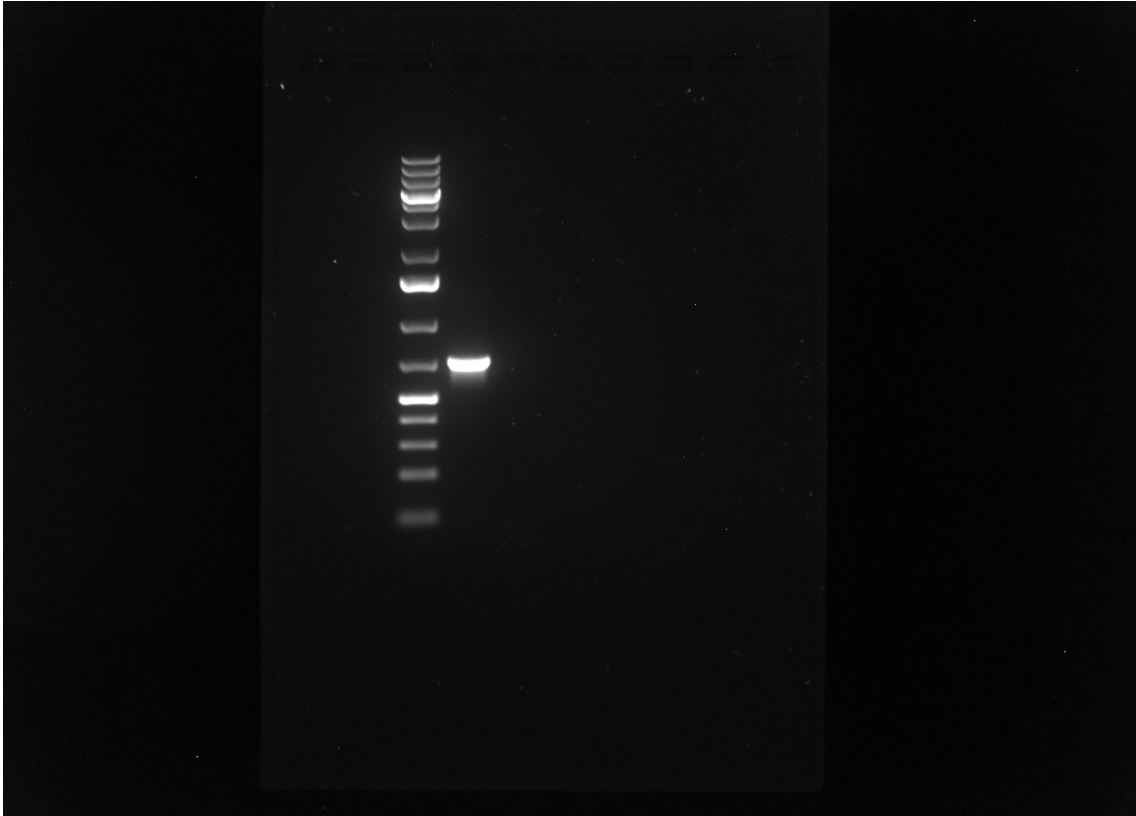

**Figure S1.** Original (uncropped) gel image for PCR confirmation of SEA1 $\Delta$ gp141.NL. PCR analysis was performed on DNA preparations from SEA1.NL and SEA1 $\Delta$ gp141.NL using primers specific for gp141. See Figure 3a in the main text for a cropped and annotated version. Image captured with a Gel Doc<sup>TM</sup> EZ Imager (Bio-Rad Laboratories, Hercules, CA, USA) running Image Lab Software (Bio-Rad Laboratories, Hercules, CA, USA).

Supplementary Materials

Table S1. Plaque Counts for Figure 4

| Phage         | Host For Growth Curve                 | Host For Plaque Formation             | Time (min) | Plaque Count <sup>1</sup> | Total PFU <sup>2</sup> |
|---------------|---------------------------------------|---------------------------------------|------------|---------------------------|------------------------|
| SEA1.NL       | <i>S. enterica</i>                    | <i>S. enterica</i>                    | 10         | 5                         | 500                    |
|               |                                       |                                       | 15         | 8                         | 800                    |
|               |                                       |                                       | 20         | 7                         | 700                    |
|               |                                       |                                       | 25         | 6                         | 600                    |
|               |                                       |                                       | 30         | 82                        | 8200                   |
|               |                                       |                                       | 35         | 205                       | 20,500                 |
|               |                                       |                                       | 40         | 414                       | 41,400                 |
|               |                                       |                                       | 45         | 424                       | 42,400                 |
|               |                                       |                                       | 50         | 588                       | 58,800                 |
|               |                                       |                                       | 55         | 519                       | 51,900                 |
|               |                                       |                                       | 60         | 508                       | 50,800                 |
|               |                                       |                                       | 70         | 529                       | 52,900                 |
| SEA1Δgp141.NL | <i>S. enterica</i>                    | <i>S. enterica</i>                    | 80         | 588                       | 58,800                 |
|               |                                       |                                       | 90         | 794                       | 79,400                 |
|               |                                       |                                       | 10         | 0                         | ND                     |
|               |                                       |                                       | 15         | 0                         | ND                     |
|               |                                       |                                       | 20         | 0                         | ND                     |
|               |                                       |                                       | 25         | 0                         | ND                     |
|               |                                       |                                       | 30         | 0                         | ND                     |
|               |                                       |                                       | 35         | 0                         | ND                     |
|               |                                       |                                       | 40         | 0                         | ND                     |
|               |                                       |                                       | 45         | 0                         | ND                     |
|               |                                       |                                       | 50         | 0                         | ND                     |
|               |                                       |                                       | 55         | 0                         | ND                     |
| SEA1Δgp141.NL | <i>S. enterica</i>                    | <i>S. enterica</i> + pUC57.Comp.gp141 | 60         | 0                         | ND                     |
|               |                                       |                                       | 70         | 0                         | ND                     |
|               |                                       |                                       | 80         | 0                         | ND                     |
|               |                                       |                                       | 90         | 0                         | ND                     |
|               |                                       |                                       | 10         | 0                         | ND                     |
|               |                                       |                                       | 15         | 1                         | 100                    |
|               |                                       |                                       | 20         | 0                         | ND                     |
|               |                                       |                                       | 25         | 0                         | ND                     |
|               |                                       |                                       | 30         | 1                         | 100                    |
|               |                                       |                                       | 35         | 0                         | ND                     |
|               |                                       |                                       | 40         | 1                         | 100                    |
|               |                                       |                                       | 45         | 0                         | ND                     |
| SEA1Δgp141.NL | <i>S. enterica</i> + pUC57.Comp.gp141 | <i>S. enterica</i> + pUC57.Comp.gp141 | 50         | 0                         | ND                     |
|               |                                       |                                       | 55         | 0                         | ND                     |
|               |                                       |                                       | 60         | 0                         | ND                     |
|               |                                       |                                       | 70         | 0                         | ND                     |
|               |                                       |                                       | 80         | 0                         | ND                     |
|               |                                       |                                       | 90         | 0                         | ND                     |
|               |                                       |                                       | 10         | 3                         | 300                    |
|               |                                       |                                       | 15         | 3                         | 300                    |
|               |                                       |                                       | 20         | 3                         | 300                    |
|               |                                       |                                       | 25         | 36                        | 3600                   |
|               |                                       |                                       | 30         | 115                       | 11,500                 |
|               |                                       |                                       | 35         | 154                       | 15,400                 |
| SEA1Δgp141.NL | <i>S. enterica</i> + pUC57.Comp.gp141 | <i>S. enterica</i> + pUC57.Comp.gp141 | 40         | 159                       | 15,900                 |
|               |                                       |                                       | 45         | 178                       | 17,800                 |
|               |                                       |                                       | 50         | 199                       | 19,900                 |
|               |                                       |                                       | 55         | 185                       | 18,500                 |
|               |                                       |                                       | 60         | 170                       | 17,000                 |
|               |                                       |                                       | 70         | 162                       | 16,200                 |
|               |                                       |                                       | 80         | 159                       | 15,900                 |
|               |                                       |                                       | 90         | 185                       | 18,500                 |

<sup>1</sup>Samples were taken at the indicated time post infection of the indicated growth curve host with the indicated phage and plated for plaque forming units (PFU) on the indicated plaque formation host. <sup>2</sup> The limit of detection for this method was 100 total PFU. Values below this are marked not detected (ND).

# Supplementary Materials

**Table S2.** Relative Light Units (RLU) Values for Figure 5

| Time (min) | Reporter <sup>1</sup> | CFU <sup>2</sup> | Well 1 <sup>3</sup> | Well 2 <sup>3</sup> | Well 3 <sup>3</sup> |
|------------|-----------------------|------------------|---------------------|---------------------|---------------------|
| 30         | SEA1.NL               | 0                | 89                  | 97                  | 110                 |
|            |                       | 10               | 95                  | 93                  | 769                 |
|            |                       | 100              | 3402                | 1415                | 1483                |
|            |                       | 1000             | 18,996              | 10,405              | 26,835              |
|            |                       | 10,000           | 193,388             | 166,517             | 219,406             |
|            |                       | 100,000          | 2,391,743           | 1,728,102           | 2,162,510           |
|            |                       | 1,000,000        | 24,317,826          | 18,751,103          | 22,537,107          |
|            |                       | 10,000,000       | 108,984,104         | 109,798,332         | 103,876,296         |
|            | SEA1Δgp141.NL         | 0                | 79                  | 63                  | 73                  |
|            |                       | 10               | 66                  | 75                  | 99                  |
|            |                       | 100              | 292                 | 268                 | 116                 |
|            |                       | 1000             | 2713                | 1793                | 2280                |
|            |                       | 10,000           | 20,713              | 21,443              | 22,189              |
|            |                       | 100,000          | 182,173             | 195,073             | 204,391             |
|            |                       | 1,000,000        | 1,311,912           | 2,011,278           | 1,947,802           |
|            |                       | 10,000,000       | 6,966,012           | 9,075,915           | 9,165,933           |
| 60         | SEA1.NL               | 0                | 102                 | 120                 | 150                 |
|            |                       | 10               | 4847                | 109                 | 2407                |
|            |                       | 100              | 9142                | 16,956              | 9036                |
|            |                       | 1000             | 154,936             | 98,564              | 162,252             |
|            |                       | 10,000           | 1,372,072           | 1,126,496           | 1,024,891           |
|            |                       | 100,000          | 18,087,287          | 16,941,758          | 13,579,220          |
|            |                       | 1,000,000        | 204,001,256         | 178,745,640         | 181,321,320         |
|            |                       | 10,000,000       | 1,656,278,720       | 1,707,652,928       | 1,305,325,888       |
|            | SEA1Δgp141.NL         | 0                | 221                 | 195                 | 158                 |
|            |                       | 10               | 515                 | 350                 | 109                 |
|            |                       | 100              | 809                 | 6828                | 958                 |
|            |                       | 1000             | 6292                | 6832                | 7300                |
|            |                       | 10,000           | 43,799              | 61,365              | 63,014              |
|            |                       | 100,000          | 468,687             | 596,868             | 650,049             |
|            |                       | 1,000,000        | 3,595,047           | 4,621,079           | 4,181,567           |
|            |                       | 10,000,000       | 10,805,696          | 11,236,214          | 9,193,990           |
| 90         | SEA1.NL               | 0                | 112                 | 129                 | 179                 |
|            |                       | 10               | 103                 | 97                  | 2754                |
|            |                       | 100              | 4835                | 16,649              | 38,781              |
|            |                       | 1000             | 184,393             | 180,095             | 267,138             |
|            |                       | 10,000           | 2,124,725           | 2,096,262           | 3,084,814           |
|            |                       | 100,000          | 64,932,680          | 65,267,258          | 90,887,212          |
|            |                       | 1,000,000        | 1,296,987,136       | 1,353,762,112       | 1,593,387,264       |
|            |                       | 10,000,000       | 2,400,130,560       | 2,351,836,608       | 2,364,236,352       |
|            | SEA1Δgp141.NL         | 0                | 264                 | 74                  | 66                  |
|            |                       | 10               | 524                 | 343                 | 198                 |
|            |                       | 100              | 3321                | 1689                | 2327                |
|            |                       | 1000             | 22,216              | 25,395              | 13,476              |
|            |                       | 10,000           | 187,973             | 148,763             | 146,704             |
|            |                       | 100,000          | 1,691,484           | 1,518,846           | 1,701,398           |
|            |                       | 1,000,000        | 8,193,574           | 8,370,005           | 9,145,152           |
|            |                       | 10,000,000       | 10,674,117          | 10,761,234          | 8,127,210           |
| 120        | SEA1.NL               | 0                | 100                 | 107                 | 170                 |
|            |                       | 10               | 2474                | 21,786              | 5182                |
|            |                       | 100              | 42,101              | 61,660              | 74,499              |
|            |                       | 1000             | 595,452             | 564,964             | 765,981             |
|            |                       | 10,000           | 11,393,379          | 11,560,336          | 11,989,371          |
|            |                       | 100,000          | 518,650,672         | 580,298,752         | 535,321,088         |
|            |                       | 1,000,000        | 2,577,768,960       | 1,965,102,720       | 2,379,218,432       |
|            |                       | 10,000,000       | 358,969,104         | 1,194,215,456       | 1,004,905,408       |
|            | SEA1Δgp141.NL         | 0                | 254                 | 78                  | 119                 |
|            |                       | 10               | 931                 | 428                 | 1237                |
|            |                       | 100              | 2761                | 2120                | 4093                |
|            |                       | 1000             | 21,043              | 39,514              | 47,658              |
|            |                       | 10,000           | 250,466             | 325,484             | 657,217             |
|            |                       | 100,000          | 3,066,944           | 3,030,819           | 3,961,988           |
|            |                       | 1,000,000        | 12,902,685          | 13,662,171          | 11,487,754          |
|            |                       | 10,000,000       | 8,260,648           | 8,308,753           | 11,613,242          |

<sup>1</sup> Phages were added to a concentration of  $1 \times 10^6$  pfu/mL in each well. <sup>2</sup> Colony forming units (CFU) per well of *S. enterica*. <sup>3</sup> Relative light units (RLU) for triplicate wells are provided for each condition. Each well value is the average of two back-to-back measurements on a GloMax® Navigator.
